# Supplementary material for: Developmental loss of neurofibromin across distributed neuronal circuits drives excessive grooming in Drosophila
Source: PLoS Genet. 2020 Jul 22;16(7):e1008920. doi: 10.1371/journal.pgen.1008920 (PMC7398555; doi:10.1371/journal.pgen.1008920)
Supplement: S1 Table — (XLSX) [file pgen.1008920.s003.xlsx]

## Sheet: Sheet1
Rank order of Gal4 line (FigS1B)	Line ID	Q1 (%)	Median (%)	Q3 (%)
1	R10D10	0	0	0.977778
2	R21B02	0.633333	1.33333	2.04444
3	R19B07	1.22222	1.88889	3.32222
4	R13B07	1.45556	2.66667	3.64444
5	R18D07	0	2.97778	12.3556
6	R20B11	2.17778	3.06667	7.92222
7	R18H02	2.06667	3.13333	9.85556
8	R22B10	0	3.17778	16.2444
9	R14F05	2.44444	3.28889	14.1111
10	R10H09	0	3.62222	15.3778
11	R24A03	0.555556	4.24444	8.68889
12	R14B11	2.17778	4.28889	11.5111
13	R18D09	2.26667	4.31111	8.44444
14	R14E06	1.84444	4.44444	5.93333
15	R11D09	0.233333	4.71111	17.1111
16	R25D01	3.64444	4.77778	21.1444
17	R12H12	2.08889	4.82222	8.61111
18	R22E09	3.1	4.82222	6.03333
19	R11B02	1.37778	5.04444	11.7556
20	R13D09	3.63333	5.11111	13.9556
21	R10B09	2.26667	5.44444	10.5222
22	R14E08	2.53333	5.46667	18.9556
23	R13C04	0.477778	5.66667	22.8222
24	R11B07	1.43333	5.73333	12.5889
25	R14H02	4.68889	5.73333	9.3
26	R14G10	3.96667	6.04444	11.6889
27	R20D06	3.78889	6.04444	14.7667
28	R18F04	2.41111	6.06667	14.5444
29	R18B11	4.36667	6.31111	9.81111
30	R21D02	2.78889	6.57778	12.2
31	R11B04	3.31111	6.6	9.81111
32	R19F12	1.25556	6.75556	18.3444
33	R20C01	4.15556	6.8	9.37778
34	R26C03	3.73333	6.86667	10.4111
35	R21H06	3.77778	6.91111	12.9444
36	R19F01	1.97778	6.93333	22.8222
37	R21B10	0.8	6.95556	9.31111
38	R24B05	2.07778	7.11111	24.6667
39	R24B01	4.18889	7.11111	28.1
40	R19G01	4.62222	7.26667	12.9444
41	R13G06	3.96667	7.28889	15.6889
42	R23H05	2.94444	7.37778	15.9333
43	R12H11	4.07778	7.51111	11.8
44	R12G10	1.87778	7.57778	26.6889
45	R12F11	2.58889	7.68889	28.8111
46	R10H05	5.05556	7.73333	13.1222
47	R14B01	1.61111	7.82222	24.8444
48	R16F02	2.97778	7.95556	13.8222
49	R24G08	0.833333	8.17778	27.1222
50	R10G06	0	8.31111	17.1778
51	R19F09	4.71111	8.53333	14.1667
52	R14A12	5.93333	8.66667	10.2111
53	R23E11	4.94444	8.75556	13.3889
54	R12G06	6.98889	8.8	14.3889
55	R10F07	1.2	9.11111	14.2667
56	R12C07	0.0666667	9.17778	14.2333
57	R26D04	2.12222	9.26667	41.2444
58	R13E04	4.75556	9.28889	13.2444
59	R12F05	0.933333	9.42222	18.6667
60	R12H05	6.12222	9.44444	15.1
61	R13B10	4.1	9.51111	18.9667
62	R12G12	5.11111	9.53333	14.4333
63	R21H11	4.84444	9.77778	12.3444
64	R13A04	6.74444	9.97778	18.4667
65	R11F12	1.48889	10.0444	13.9667
66	R23A05	6	10.1111	16.2222
67	R14C12	2.36667	10.1333	15.1111
68	R10A07	0.388889	10.4222	21.9
69	R18H03	3.67778	10.4444	13.5111
70	R10G03	4.06667	10.6889	23.2222
71	R19B09	2.27778	10.7778	24.1444
72	R20A03	1.92222	10.8667	28.5333
73	R14E12	7.01111	10.9778	40.5111
74	R26A01	6.3	11.2667	22.3444
75	R30A10	8.55556	11.3333	29.9889
76	R13A07	6.38889	11.3556	15.4444
77	R24E08	6.28889	11.6667	24.6444
78	R14D01	6.46667	11.6889	15.4778
79	R11A12	5.62222	11.9778	17.1222
80	R19H10	3.9	12.0222	20.9
81	R10G01	3.64444	12.0444	14.0889
82	R53A06	5.5	12.2	29.3
83	R12B10	3.95556	12.2222	24.5556
84	R12F03	8.4	12.2222	18.8111
85	R20B07	2.57778	12.2667	15.9667
86	R16C06	0.344444	12.3111	18.5111
87	R12A11	8.44444	12.4	29.8
88	R22G07	6.25556	12.4	18.6444
89	R26F05	6.8	12.4889	17.6333
90	R21G11	3.47778	12.5333	13.4333
91	R32B03	9.16667	12.5778	19.8444
92	R22A07	4.84444	12.8222	18.9222
93	R19G04	6.23333	13.1111	23.8
94	R24C05	2.4	13.2667	36.6889
95	R12F01	2.31111	13.4444	25.4667
96	R10E04	9.13333	13.4889	34.2333
97	R27A10	6.94444	13.4889	24.3333
98	R22H02	7.42222	13.5333	32.2667
99	R24A02	11.5111	13.9556	21.1556
100	R11H05	3.96667	14.0667	19.1667
101	R12G01	10.4222	14.0889	18.3111
102	R50B07	11.7	14.2	30
103	R16B01	6.66667	14.5333	18.0333
104	R27G06	5.45556	14.7111	34.9444
105	R22G02	6.28889	15.2667	18.1778
106	R24B07	4.48889	15.4	31.7556
107	R24F06	8.84444	15.4444	29.5222
108	R10C05	12.1333	15.7333	18.0222
109	R24B11	7.25556	15.7333	24.5667
110	R24C10	3	16.0444	28.2667
111	R25C08	6.42222	16.1556	24.6222
112	R12E03	13.4333	16.5778	24.1667
113	R24B09	8.83333	16.6889	26.6444
114	R23D12	10.6556	16.7778	28.8333
115	R12H03	3.02222	17.1778	29.0778
116	R72B05	11.3333	17.2222	22.0222
117	R22B01	13.5333	17.2667	32.6222
118	R26E09	10.0444	17.5333	32.6778
119	R24G01	12.6556	17.6667	31.4
120	R24D10	5.08889	17.8	47.6222
121	R24B02	10.9333	18.3111	30.2111
122	R26B07	7.64444	18.3556	54.2889
123	R30C08	9.34444	18.3778	47.6667
124	R29E02	13.7444	18.4667	25.6556
125	R20G12	11.5222	18.8444	29.2556
126	R23A07	0.844444	18.8889	25.3333
127	R29A07	15.9444	19.2	36.9444
128	R25F10	16.6889	19.2667	34.9556
129	R12G04	6.43333	19.4667	56.2333
130	R37F06	11.9111	19.7778	34.0778
131	R17C09	7.14444	20.1333	29.9889
132	R26B10	14.5556	20.1333	37.2667
133	R23H11	8.91111	20.2444	44.3222
134	R24A07	12.0556	20.3111	35.9778
135	R31H10	9.9	20.4	29
136	R26A02	14.3889	20.6444	29.0444
137	R13F11	13.2667	21.0222	23.8111
138	R24G06	18.1444	21.0444	29.9778
139	R26D03	11.6444	21.1111	50.2111
140	R30H02	17.4333	21.2667	62.5889
141	R13A08	10.9333	21.2889	28.0556
142	R11A01	4.06667	21.4	40.6444
143	R25G04	14.1333	21.4889	42.9889
144	R10B02	6.55556	21.5333	46.6
145	R21H12	3.16667	21.7333	34.8333
146	R30B01	11.1	21.7	29.3
147	R24C04	8.57778	21.8444	41.9333
148	R32F06	12.7444	22.2222	57.3111
149	R14B03	15.4222	22.3333	29.6556
150	R31D09	10.4	22.5556	39.9778
151	R81E10	14.9	23	27.3
152	R41G09	15.5	23.4	25.6667
153	R25D08	15.6222	23.5333	37.9778
154	R12D02	11.7444	24	40.6333
155	R26B02	16.5	24.1556	38.9333
156	R12D09	7.57778	24.2667	37.0111
157	R25C03	16.0889	24.3333	41.1667
158	R24H08	10.8444	24.3556	35.1222
159	R15F08	17.4556	24.9333	36.8556
160	R11B12	14.0111	25	53.2778
161	R25B02	6.13333	25	40.6222
162	R24E09	7.38889	25.4889	36.8778
163	R41B07	21.9778	25.5333	36.7222
164	R21H10	10.1	26.0667	40.5444
165	R41B12	13.3778	26.1333	35.2556
166	R30D04	11.9667	26.3556	37.3889
167	R24H12	6	27.6444	35.4444
168	R25F06	23.6333	27.9778	56.1667
169	R23C06	1.85556	28.0222	44.1667
170	R21A12	9.75556	28.0667	44.3333
171	R26F03	12.4889	28.5333	40.5
172	R25E04	21.7889	28.8889	47.0444
173	R10H02	15.9556	29.2667	41.4778
174	R22H10	15.7667	30.8444	40.4444
175	R24D02	22.9	30.9333	46.5889
176	R42B09	22.6	31.2222	57.0444
177	R24F03	7.51111	31.4667	44.1556
178	R43H12	17.3111	32.5556	55.6778
179	R24H03	16.7667	33.8889	56.2889
180	R41G07	21.4	34.1556	58.0111
181	R24E06	32.0444	34.3778	62.4222
182	R25H03	24.0111	35.0222	44
183	R52A06	27.3	35.3	49.1
184	R42H11	21.8333	35.4667	45.2778
185	R22G10	18.8667	35.9556	42.9778
186	R41G11	21.0667	37.2222	50.6333
187	R24F10	20.9889	37.2667	49.7222
188	R40D12	28.9667	38.3556	50.3333
189	R24G09	21.5667	39.7111	56.2222
190	R34C07	27.0667	40.3556	55.9444
191	R41D01	25.8222	41.8667	59.8222
192	R11B06	28.4444	42.3111	51.7667
193	R42F06	36.2222	43.4	53.0778
194	R27E03	14.4556	43.8222	84.7111
195	R42A08	32.8222	45.6444	56.3444
196	R30F11	12.2444	45.6889	56.1222
197	R24F08	33.8667	45.9333	51.8889
198	R10G03	35.2222	45.9778	52.1333
199	R26B03	37.3778	46.6444	53.7444
200	R27G11	25.5778	46.7333	69.3667
201	R42D11	38.0111	47.3778	57.4222
202	R28A09	15.5111	48.0667	57.6444
203	R24G07	28.6333	48.6444	62.9778
204	R36B11	41.3889	49.1556	60.5556
205	R32A10	38.6444	50.3333	61.9556
206	R13B05	38.7444	51.0222	83.4222
207	R31E07	25.2889	51.3556	59.8889
208	R25F04	18.3444	52.2889	84.9222
209	R30A06	31.8111	53.2444	67.7
210	R13F10	19.7	53.3556	60.8889
211	R42C06	41.6556	57.6222	65.9556
212	R42B02	36	58.6667	69.1222
